# Supplementary material for: Black rutile (Sn, Ti)O2 initializing electrochemically reversible Sn nanodots embedded in amorphous lithiated titania matrix for efficient lithium storage
Source: Royal Society of Chemistry journal article supplement (doi:10.1039/c6ta05645h), 2016-01-01
Supplement: c6ta05645h1.pdf [file c6ta05645h1.pdf]

## Supporting Information

### **Black Rutile of (Sn,Ti)O<sub>2</sub> initializing electrochemically Reversible Sn Nanodots Embedded in Amorphous Lithiated Titania Matrix for Efficient Lithium Storage**

*Jijian Xu<sup>1,2§</sup>, Wujie Dong<sup>3§</sup>, Changsheng Song<sup>1</sup>, Yufeng Tang<sup>1</sup>, Wenli Zhao<sup>1</sup>,  
Zhanglian Hong<sup>2,\*</sup>, Fuqiang Huang<sup>1,2,3,\*</sup>*

<sup>1</sup> State Key Laboratory of High Performance Ceramics and Superfine Microstructure, Shanghai Institute of Ceramics, Chinese Academy of Sciences, Shanghai 200050, P.R. China;

<sup>2</sup> State Key Laboratory of Silicon Materials, School of Materials Science and Engineering, Zhejiang University, Hangzhou 310027, P.R. China;

<sup>3</sup> State Key Laboratory of Rare Earth Materials Chemistry and Applications, College of Chemistry and Molecular Engineering, Peking University, Beijing 100871, P.R. China.

§These authors contributed equally to this work.

\*Corresponding Author: [huangfq@mail.sic.ac.cn](mailto:huangfq@mail.sic.ac.cn); [hong\\_zhanglian@zju.edu.cn](mailto:hong_zhanglian@zju.edu.cn)

## Theoretical Section

Calculations have been performed within the framework of density functional theory (DFT) as implemented by the Vienna an initio Simulation Package (VASP).<sup>[S1,S2]</sup> The exchange-correlation energy is treated in the generalized-gradient approximation (GGA) using Perdew-Burke-Ernzerhof (PBE) functional.<sup>[S3]</sup> The model was constructed on the 1×1 (101) surface (30 atomic layer) with a 20 Å vacuum layer. Here, the cutoff energy of plane wave was chosen at 450 eV. For the structure optimizations, 7×7×1 Monkhorst-Pack (MP) grids were used. The changes in total energies between two successive electronic steps are less than 10<sup>-5</sup> eV, meanwhile, all the Hellmann-Feynman force acting on each atoms was lower than 0.05 eV /Å.

**Table S1. Comparison of capacity retention and high rate performance for (Sn,Ti)O<sub>2</sub> based anodes.**

| (Sn,Ti)O <sub>2</sub> -based systems                      | Elemental ratio  | Long cycles@0.2 A g <sup>-1</sup> (mA h g <sup>-1</sup> ) | High rate capacity (mA h g <sup>-1</sup> ) | References      |
|-----------------------------------------------------------|------------------|-----------------------------------------------------------|--------------------------------------------|-----------------|
| <b>Black (Sn,Ti)O<sub>2</sub></b>                         | <b>80 at% Sn</b> | <b>583 (100 cycles)</b>                                   | <b>335 (5 A g<sup>-1</sup>)</b>            | <b>Our work</b> |
| SnO <sub>2</sub> nanoflakes on TiO <sub>2</sub> nanotubes | 80 at% Sn        | 530 (50 cycles)                                           | 358 (3.2 A g <sup>-1</sup> )               | 2014 [S4]       |
| SnO <sub>2</sub> @TiO <sub>2</sub> double shell nanotubes | 48 at% Sn        | 300 (50 cycles)                                           | 200 (1.5 A g <sup>-1</sup> )               | 2013 [S5]       |
| (Sn,Ti)O <sub>2</sub> solid solution nanorods             | 20 at% Sn        | 300 (50 cycles)                                           | 217 (3 A g <sup>-1</sup> )                 | 2013 [S6]       |
| Ordered network of interconnected SnO <sub>2</sub>        | 100 at% Sn       | 564 (100 cycles)                                          | 300 (4.7 A g <sup>-1</sup> )               | 2015 [S7]       |
| Black anatase titania                                     | 100 at% Ti       | 188 (100 cycles)                                          | 158 (5 A g <sup>-1</sup> )                 | 2013 [S8]       |

**Table S2** Lattice parameters of the samples with different stoichiometric.

| Sample                                              | 2-Theta(110) | $d_{(110)}$ -calculated | $d_{(110)}$ -theoretical |
|-----------------------------------------------------|--------------|-------------------------|--------------------------|
| B-SnO <sub>2</sub>                                  | 26.611       | 3.347                   | 3.347                    |
| B-S <sub>0.8</sub> Ti <sub>0.2</sub> O <sub>2</sub> | 26.790       | 3.325                   | 3.327                    |
| B-S <sub>0.6</sub> Ti <sub>0.4</sub> O <sub>2</sub> | 26.964       | 3.304                   | 3.307                    |
| Rutile-TiO <sub>2</sub>                             | 27.446       |                         | 3.247                    |

**Table S3** Comparison of the detail data of equivalent circuit for (Sn,Ti)O<sub>2</sub> based anodes.

| Sample             | R <sub>s</sub> | R <sub>ct</sub> | W-R   | W-T    | W-P    | CPE-P  | CPE-T                  |
|--------------------|----------------|-----------------|-------|--------|--------|--------|------------------------|
| B-STO <sub>2</sub> | 3.89           | 90.1            | 119.9 | 0.9479 | 0.4497 | 0.7461 | 2.761*10 <sup>-5</sup> |
| W-STO <sub>2</sub> | 4.2            | 192.0           | 171.9 | 1.409  | 0.4488 | 0.7927 | 1.536*10 <sup>-5</sup> |

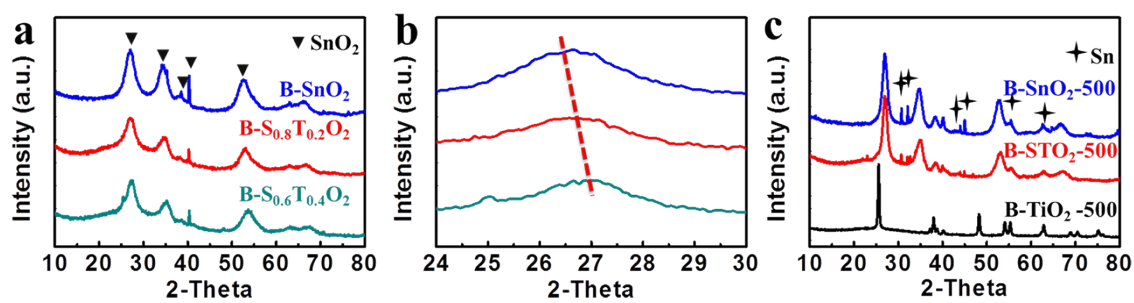

**Figure S1.** XRD characterization of the samples with different stoichiometric (a), partial magnifications of the region showing the shift of peak positions (b), and samples after hydrogen plasma reduction at 500 °C.

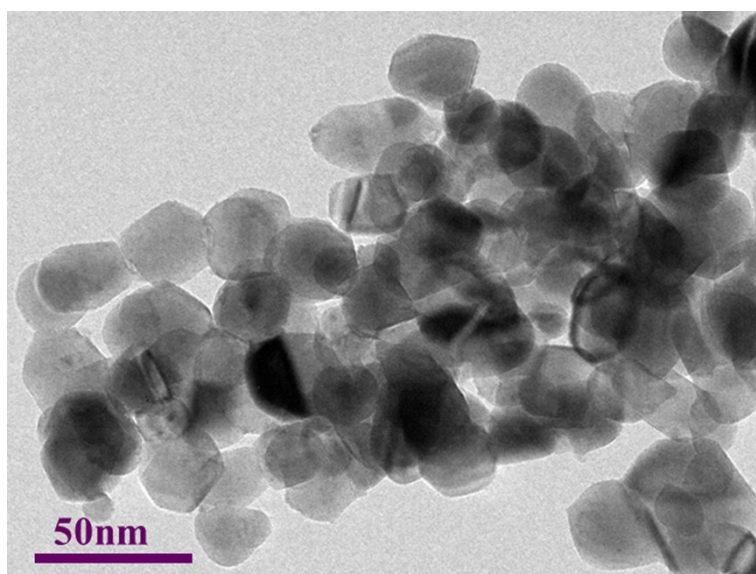

**Figure S2.** The TEM of air annealed W-STO<sub>2</sub>.

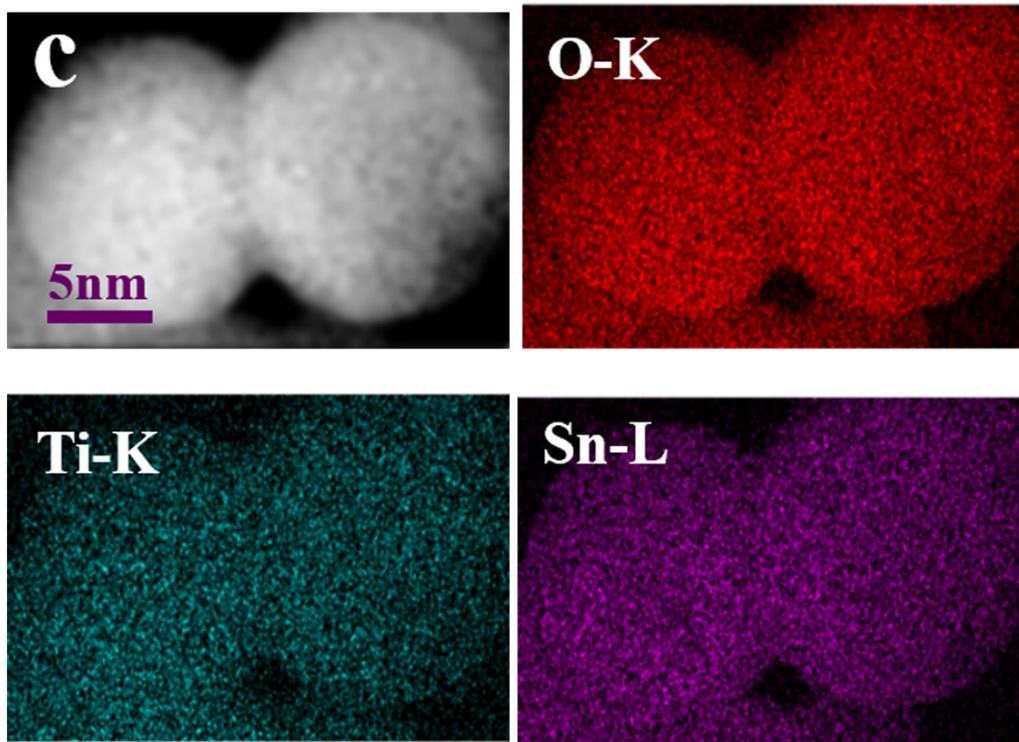

**Figure S3.** Elemental mapping images of B-STO<sub>2</sub> of oxygen, titanium, and stannum.

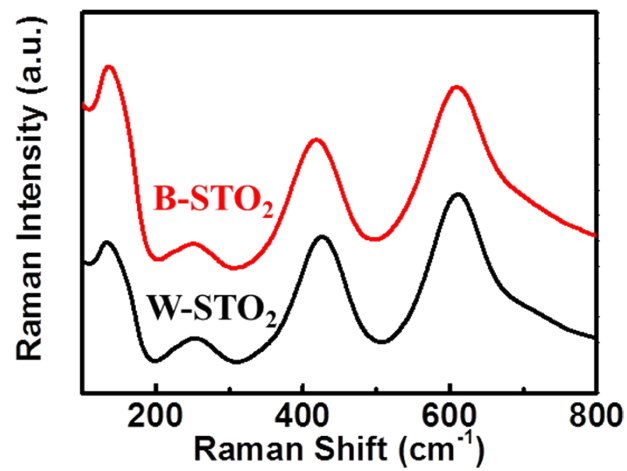

**Figure S4.** The Raman spectra of air annealed W-STO<sub>2</sub>, and B-STO<sub>2</sub> after hydrogen plasma reduction.



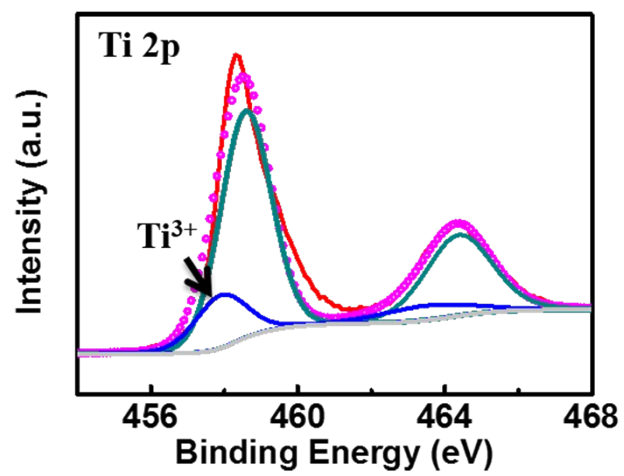

**Figure S5.** The XPS spectra of hydrogen plasma reduced B-STO<sub>2</sub>.

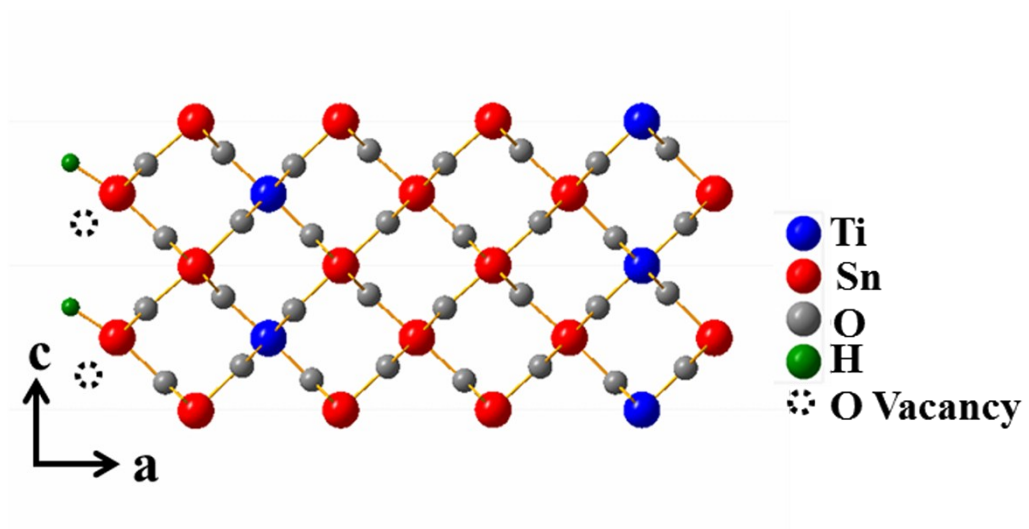

Figure S6. Schematic of the structure of B-STO<sub>2</sub>.

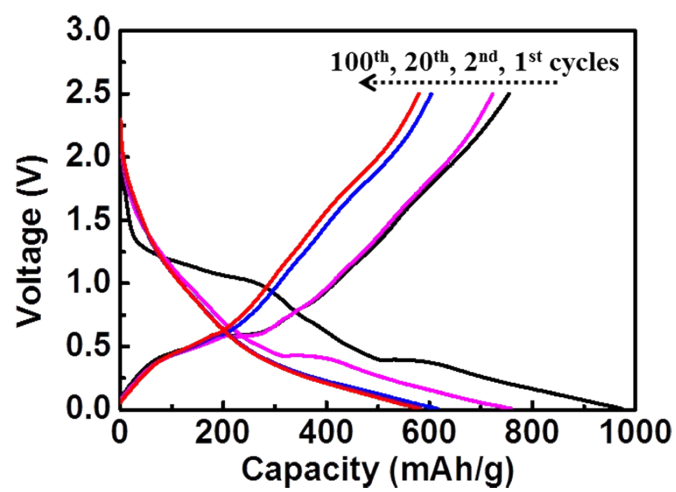

**Figure S7.** Galvanostatic charge/discharge curves of the 1<sup>st</sup>, 2<sup>nd</sup>, 20<sup>th</sup>, and 100<sup>th</sup> cycle of the B-STO<sub>2</sub> electrode.

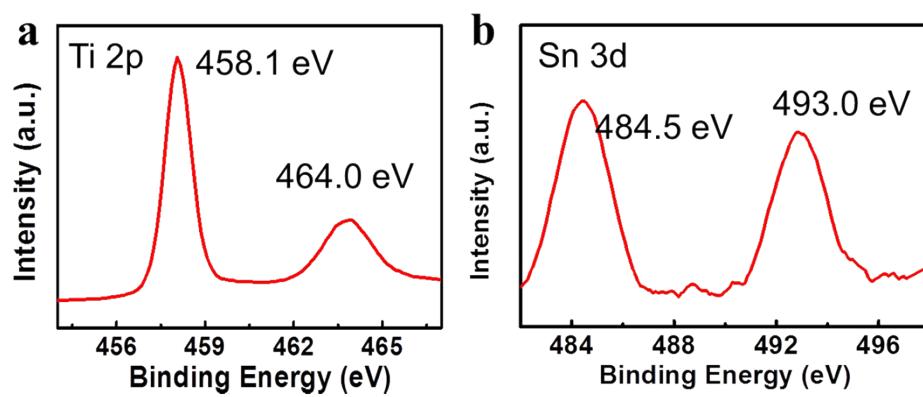

**Figure S8.** Sn 3d spectra and Ti 2p spectra of B-STO<sub>2</sub> after discharging.

- [S1] P. E. Blöchl, *Phys. Rev. B* 1994, 50, 17953.
- [S2] G. Kresse, and J. Furthmüller, *Phys. Rev. B* 1996, 54, 11169.
- [S3] M. C. Payne, M. P. Teter, D. C. Allan, T. A. Arias, J. D. Joannopoulos, *Rev. Mod. Phys.* 1992, 64, 1045.
- [S4] C. R. Zhu, X. H. Xia, J. L. Liu, Z. X. Fan, D. L. Chao, H. Zhang, H. J. Fan, *Nano Energy* 2014, 4, 105.
- [S5] J. H. Jeun, K. Y. Park, D. H. Kim, W. S. Kim, H. C. Kim, B. S. Lee, H. Kim, W. R. Yu, K. Kang, S. H. Hong, *Nanoscale*, 2013, 5, 8480.
- [S6] C. C. Chang, Y. C. Chen, C. W. Huang, Y. H. Su, C. C. Hu, *Electrochim. Acta* 2013, 99, 69.
- [S7] V. Etacheri, G. A. Seisenbaeva, J. Caruthers, G. Daniel, J. M. Nedelec, V. G. Kessler, V. G. Poi, *Adv. Energy Mater.* 2015, 5(5).
- [S9] S. T. Myung, M. Kikuchi, C. S. Yoon, H. Yashiro, S. J. Kim, Y. K. Sun, B. Scroasti, *Energy Environ. Sci.* 2013, 6, 2609.
